# Supplementary material for: Functional Study of Lipoxygenase-Mediated Resistance against Fusarium verticillioides and Aspergillus flavus Infection in Maize
Source: MDPI journal article supplement (doi:10.3390/ijms231810894), 2022-09-17
Supplement: s1 [file s1]

**Figure S1.** Overview of protein domain architecture of 9-LOX allozymes in the maize pan-genome using MUSCLE generated alignments and CDD. The protein sequences were retrieved from the B73\_v5 reference genome, the 25 NAM founder genomes, and Mo17, W22, PH207, EP1 and F7 line genomes. Yellow and green rectangles represent PLAT/LH2 (PF01477) and lipoxxygenase domain (PF00305), respectively. Stars (\*) indicate the absence of the C-terminal isoleucine. (A) ZmLOX1: highly conserved in all the genotypes considered, except PH207, which is truncated at the C-terminal, thus lacking the Fe-coordinating isoleucine with a likely loss of functionality. (B) ZmLOX2: highly conserved in all the genotypes considered, but absent in PH207. (C) ZmLOX3: a tandem duplication occurs in PH207; premature C-terminal truncation (no isoleucine, likely non-functional) in Ky21 and Ki3; absent in Tx303. (D) ZmLOX4: absent in PH207, CML277 and CML333 genotypes. (E) ZmLOX5: B97, CML247, P39 and Tzi8 genotypes lack the PLAT/LH2 domain, while PH207 is prematurely truncated at the C-terminal (no isoleucine, likely non-functional). (F) ZmLOX12: absent in CML228 and CML247 genotypes; incomplete and non-functional in W22; premature C-terminal truncation in Mo17.

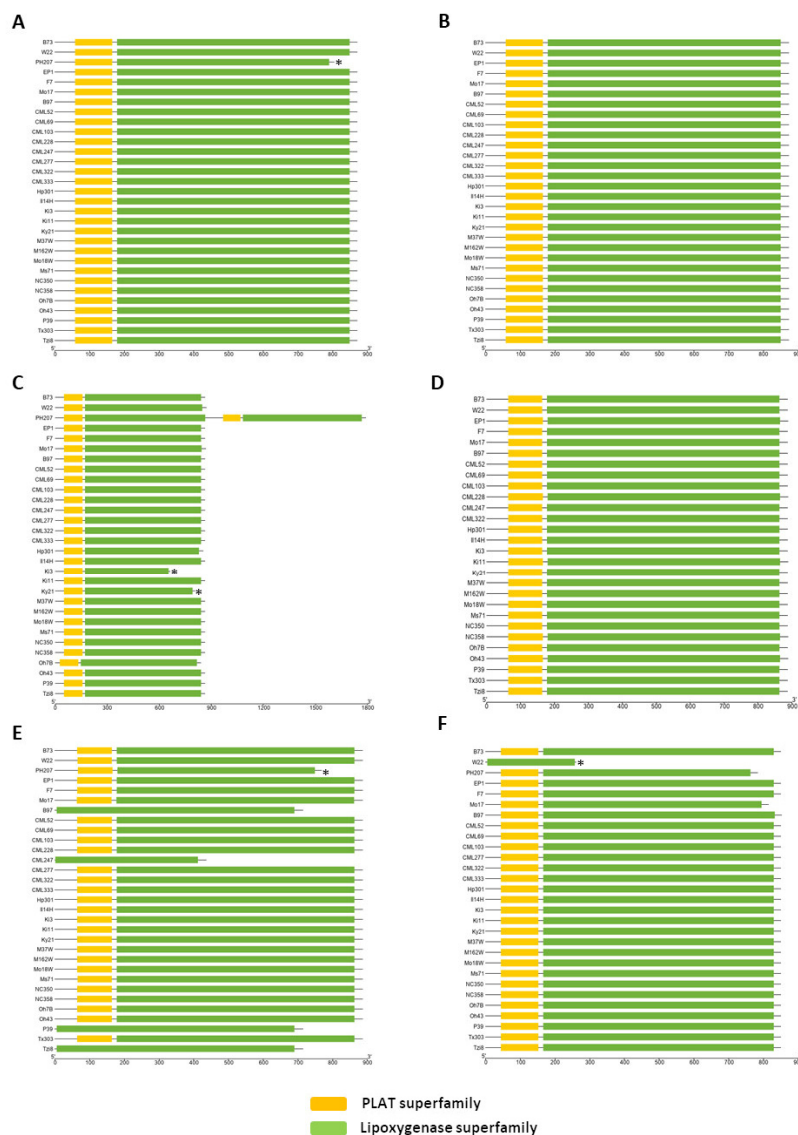

**Figure S2.** Overview of protein domain architecture of 13-LOX allozymes and ZmLOX6 lyase in the maize pan-genome using MUSCLE generated alignments and CDD. The protein sequences were retrieved from the B73\_v5 reference genome, the 25 NAM founder genomes, and Mo17, W22, PH207, EP1 and F7 line genomes as above. Yellow and green rectangles represent PLAT/LH2 (PF01477) and lipoxxygenase domain (PF00305), respectively. Stars (\*) indicate the absence of the terminal isoleucine. (A) ZmLOX6: all genotypes lack PLAT/LH2 domain; a C-terminal fusion with other domains, such as FGART-AT\_N (PF18076), FGART-AT\_linker (PF18072), PurM-like (PF02769), and GAT\_1 (PF13507), indicated with different colors in the figure, is present in Mo17. (B) ZmLOX7: CML333, PH207, Il14H and M37W genotypes lack PLAT/LH2 domain. The C-terminal isoleucine is missing in B97, M37W and P39 (likely non-functional). (C) ZmLOX8: PH207 lacks PLAT/LH2 domain and is prematurely truncated at the C-terminal (no isoleucine, likely non-functional). (D) ZmLOX9: highly conserved domain structure, the C-terminal isoleucine is missing in PH207 (likely non-functional). (E) ZmLOX10: highly conserved domain structure in all genotypes. (F) ZmLOX11: highly conserved domain structure, prematurely truncated at the C-terminal (no isoleucine, likely non-functional) in Mo71. (G) ZmLOX13: PLAT/LH2 domain is absent in all genotypes.

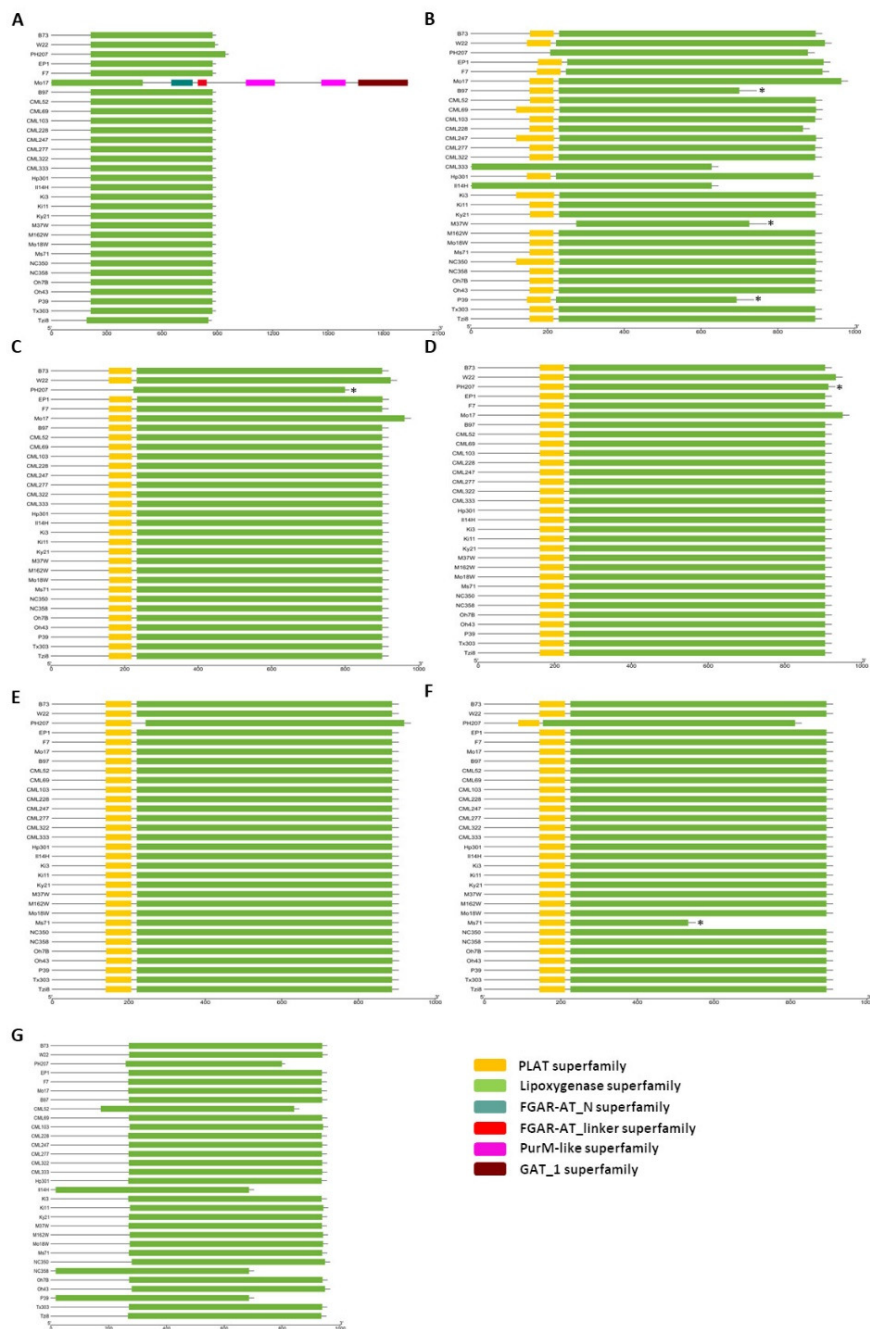

**Figure S3.** Heat map and clustering of differentially expressed *ZmLOX*, oxylipin- and JA-related genes grouped in two clusters based on fungal inoculation (*F. verticillioides* and *A. flavus*) at 3 and 7 dpi in Tzi18, Mo17, W22 and UFMu $\textit{lox4}$  lines. The color scale indicates fold change (FC) values (red and blue refer to upregulated and downregulated genes, respectively). The heat map and clustering of FC expression values were generated with pheatmap R package.

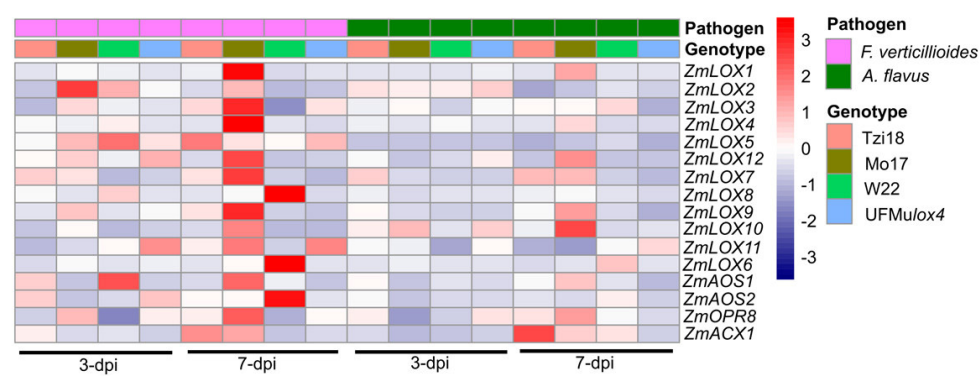

**Table S1.** Percentage (%) of Fusarium and Aspergillus ear rot (FER and AER, respectively) severity for Tzi18, Mo17, W22 and UFMu $\textit{lox4}$  at 7 dpi.

|       | Tzi18          | Mo17            | W22             | UFMu $\textit{lox4}$ |
|-------|----------------|-----------------|-----------------|----------------------|
| FER % | 3.50 $\pm$ 0.5 | 25.50 $\pm$ 2.3 | 50.60 $\pm$ 4.5 | 65.00 $\pm$ 5.4      |
| AER % | 5.70 $\pm$ 1.4 | 55.00 $\pm$ 3.5 | 51.50 $\pm$ 3.5 | 71.40 $\pm$ 5.7      |

**Table S2.** Distribution (%) of the total fatty acid fraction in Tzi18 and Mo17 at 7 dpi.

**Maize Inbred line Tzi18**

| Fatty acid fraction | Chromatogram | Distribution of the total fatty acid fraction (%) |      |                  |      |                           |      | Genotype average (%) |      |
|---------------------|--------------|---------------------------------------------------|------|------------------|------|---------------------------|------|----------------------|------|
|                     |              | mock                                              | SD   | <i>A. flavus</i> | SD   | <i>F. verticillioides</i> | SD   | average              | SD   |
| 14:0                | 227.3        | 0,28                                              | 0,21 | 0,03             | 0,00 | 0,05                      | 0,03 | 0,12                 | 0,14 |
| 18:3                | 277.3        | 3,71                                              | 0,51 | 2,62             | 0,11 | 2,68                      | 0,81 | 3,00                 | 0,61 |
| 16:1                | 253.3        | 0,14                                              | 0,03 | 0,10             | 0,01 | 0,14                      | 0,09 | 0,13                 | 0,02 |
| 18:2                | 279.3        | 54,06                                             | 2,63 | 52,35            | 0,89 | 50,78                     | 3,78 | 52,40                | 1,64 |
| 16:0                | 255.3        | 27,10                                             | 0,44 | 19,39            | 0,35 | 22,06                     | 2,60 | 22,85                | 3,91 |
| 18:1                | 281.3        | 9,70                                              | 0,97 | 22,52            | 1,36 | 20,82                     | 6,67 | 17,68                | 6,97 |
| 18:0                | 283.3        | 4,71                                              | 1,68 | 2,56             | 0,05 | 2,83                      | 0,56 | 3,37                 | 1,17 |

**Maize Inbred line Mo17**

| Fatty acid fraction | Chromatogram | Distribution of the total fatty acid fraction (%) |      |                  |      |                           |      | Genotype average (%) |      |
|---------------------|--------------|---------------------------------------------------|------|------------------|------|---------------------------|------|----------------------|------|
|                     |              | mock                                              | SD   | <i>A. flavus</i> | SD   | <i>F. verticillioides</i> | SD   | average              | SD   |
| 14:0                | 227.3        | 0,14                                              | 0,07 | 0,03             | 0,01 | 0,04                      | 0,01 | 0,07                 | 0,06 |
| 18:3                | 277.3        | 2,36                                              | 0,21 | 1,40             | 0,14 | 1,61                      | 0,14 | 1,79                 | 0,51 |
| 16:1                | 253.3        | 0,25                                              | 0,11 | 0,13             | 0,01 | 0,16                      | 0,01 | 0,18                 | 0,06 |
| 18:2                | 279.3        | 51,53                                             | 2,78 | 51,91            | 2,93 | 50,31                     | 3,77 | 51,25                | 0,84 |
| 16:0                | 255.3        | 23,49                                             | 1,44 | 16,34            | 0,96 | 17,25                     | 1,44 | 19,03                | 3,89 |
| 18:1                | 281.3        | 16,74                                             | 0,83 | 26,24            | 1,91 | 25,94                     | 1,69 | 22,97                | 5,40 |
| 18:0                | 283.3        | 5,31                                              | 1,70 | 3,69             | 0,61 | 4,00                      | 0,80 | 4,33                 | 0,86 |

**Table S3.** Distribution (%) of galactolipids in Tzi18 and Mo17 at 7 dpi.

**Maize Inbred line Tzi18**

| Galactolipids | Extracted Ion<br>(m/z) | Distribution of galactolipids (%) |      |                  |      |                           |      | Genotype average (%) |      |
|---------------|------------------------|-----------------------------------|------|------------------|------|---------------------------|------|----------------------|------|
|               |                        | mock                              | SD   | <i>A. flavus</i> | SD   | <i>F. verticillioides</i> | SD   | average              | SD   |
| Mono 36:6     | 797.7                  | 6,12                              | 0,62 | 6,94             | 0,60 | 7,64                      | 0,50 | 6,90                 | 0,76 |
| Mono 36:5     | 799.7                  | 7,98                              | 0,82 | 6,54             | 0,49 | 7,24                      | 0,13 | 7,25                 | 0,72 |
| Mono 36:4     | 801.7                  | 18,53                             | 0,40 | 18,88            | 0,88 | 17,49                     | 0,44 | 18,30                | 0,73 |
| Mono 34:3     | 775.7                  | 0,81                              | 0,05 | 0,63             | 0,19 | 2,86                      | 3,59 | 1,43                 | 1,24 |
| Mono 34:2     | 777.7                  | 2,03                              | 0,73 | 2,20             | 0,35 | 2,15                      | 0,43 | 2,13                 | 0,09 |
| Di 36:6       | 959.7                  | 3,58                              | 0,99 | 3,47             | 0,06 | 3,55                      | 0,37 | 3,53                 | 0,06 |
| Di 36:5       | 961.7                  | 8,92                              | 0,54 | 8,60             | 0,64 | 8,49                      | 0,37 | 8,67                 | 0,22 |
| Di 36:4       | 963.7                  | 22,84                             | 1,50 | 23,67            | 1,57 | 22,86                     | 0,90 | 23,12                | 0,47 |
| Di 36:3       | 965.7                  | 6,65                              | 0,24 | 6,12             | 0,64 | 4,16                      | 3,12 | 5,64                 | 1,31 |
| Di 36:2       | 967.7                  | 1,69                              | 0,32 | 2,14             | 0,12 | 2,17                      | 0,43 | 2,00                 | 0,27 |
| Di 36:1       | 969.7                  | 0,26                              | 0,04 | 0,30             | 0,10 | 0,31                      | 0,15 | 0,29                 | 0,03 |
| Di 34:3       | 937.7                  | 3,27                              | 0,34 | 3,31             | 0,21 | 3,23                      | 0,38 | 3,27                 | 0,04 |
| Di 34:2       | 939.7                  | 14,43                             | 0,35 | 14,20            | 0,64 | 14,75                     | 0,80 | 14,46                | 0,28 |
| Di 34:1       | 941.7                  | 2,42                              | 0,04 | 2,65             | 0,43 | 2,72                      | 0,31 | 2,60                 | 0,15 |

**Maize Inbred line Mo17**

| Galactolipids | Extracted Ion<br>(m/z) | Distribution of galactolipids (%) |      |                  |      |                           |      | Genotype average (%) |      |
|---------------|------------------------|-----------------------------------|------|------------------|------|---------------------------|------|----------------------|------|
|               |                        | mock                              | SD   | <i>A. flavus</i> | SD   | <i>F. verticillioides</i> | SD   | average              | SD   |
| Mono 34:2     | 777.7                  | 1,68                              | 0,76 | 1,26             | 0,36 | 1,14                      | 0,52 | 1,36                 | 0,28 |
| Mono 34:3     | 775.7                  | 0,61                              | 0,11 | 0,49             | 0,05 | 0,57                      | 0,01 | 0,56                 | 0,06 |
| Mono 36:4     | 801.7                  | 17,95                             | 0,53 | 17,71            | 0,38 | 17,47                     | 0,26 | 17,71                | 0,24 |
| Mono 36:5     | 799.7                  | 6,42                              | 0,07 | 5,90             | 0,31 | 6,37                      | 0,07 | 6,23                 | 0,29 |
| Mono 36:6     | 797.7                  | 4,92                              | 0,20 | 5,64             | 0,21 | 7,49                      | 0,77 | 6,02                 | 1,33 |
| Di 34:1       | 941.7                  | 2,95                              | 0,08 | 3,12             | 0,27 | 3,12                      | 0,23 | 3,07                 | 0,10 |
| Di 34:2       | 939.7                  | 14,82                             | 0,40 | 14,91            | 0,20 | 13,86                     | 0,65 | 14,53                | 0,58 |
| Di 34:3       | 937.7                  | 2,75                              | 0,24 | 2,69             | 0,15 | 2,66                      | 0,17 | 2,70                 | 0,05 |
| Di 36:1       | 969.7                  | 0,26                              | 0,09 | 0,37             | 0,10 | 0,37                      | 0,16 | 0,34                 | 0,07 |
| Di 36:2       | 967.7                  | 2,21                              | 0,50 | 2,27             | 0,30 | 2,21                      | 0,42 | 2,23                 | 0,03 |
| Di 36:3       | 965.7                  | 10,12                             | 0,72 | 9,63             | 0,42 | 8,61                      | 0,42 | 9,46                 | 0,77 |
| Di 36:4       | 963.7                  | 23,70                             | 0,22 | 24,54            | 0,87 | 23,88                     | 0,70 | 24,04                | 0,44 |
| Di 36:5       | 961.7                  | 8,35                              | 0,53 | 8,07             | 0,31 | 7,91                      | 0,40 | 8,11                 | 0,22 |
| Di 36:6       | 959.7                  | 2,94                              | 0,08 | 3,12             | 0,41 | 4,10                      | 0,30 | 3,38                 | 0,62 |

**Table S4.** Distribution (%) of TAG species in Tzi18 and Mo17 at 7 dpi.

**Maize Inbred line Tzi18**

| TAG species | Extracted Ion (m/z) | Distribution of TAG species (%) |      |                  |      |                           |      | Genotype average (%) |      |
|-------------|---------------------|---------------------------------|------|------------------|------|---------------------------|------|----------------------|------|
|             |                     | mock                            | SD   | <i>A. flavus</i> | SD   | <i>F. verticillioides</i> | SD   | average              | SD   |
| 50:1        | 855.7; 850.7        | 2,76                            | 0,08 | 2,86             | 0,19 | 3,04                      | 0,35 | 2,89                 | 0,14 |
| 50:2        | 853.7; 848.7        | 4,01                            | 0,14 | 4,12             | 0,06 | 4,06                      | 0,06 | 4,06                 | 0,05 |
| 50:3        | 851.7; 846.7        | 0,70                            | 0,02 | 0,75             | 0,01 | 0,80                      | 0,04 | 0,75                 | 0,05 |
| 50:4        | 849.7; 844.7        | 0,22                            | 0,01 | 0,28             | 0,00 | 0,26                      | 0,02 | 0,26                 | 0,03 |
| 52:1        | 883.8; 878.8        | 0,70                            | 0,06 | 1,32             | 0,13 | 1,39                      | 0,50 | 1,13                 | 0,38 |
| 52:2        | 881.8; 876.8        | 7,83                            | 0,24 | 7,83             | 0,76 | 7,88                      | 1,10 | 7,85                 | 0,03 |
| 52:3        | 879.8; 874.8        | 10,86                           | 0,42 | 10,52            | 0,30 | 10,42                     | 0,14 | 10,60                | 0,23 |
| 52:4        | 877.8; 872.8        | 11,38                           | 0,36 | 11,29            | 0,53 | 10,78                     | 1,69 | 11,15                | 0,32 |
| 52:5        | 875.8; 870.8        | 2,74                            | 0,23 | 3,20             | 0,09 | 3,08                      | 0,14 | 3,01                 | 0,24 |
| 52:6        | 873.8; 868.8        | 0,28                            | 0,05 | 0,41             | 0,05 | 0,42                      | 0,03 | 0,37                 | 0,08 |
| 54:1        | 911.8; 906.8        | 0,43                            | 0,08 | 0,77             | 0,04 | 0,73                      | 0,24 | 0,64                 | 0,18 |
| 54:2        | 909.8; 904.8        | 1,84                            | 0,22 | 2,23             | 0,14 | 2,49                      | 0,56 | 2,18                 | 0,33 |
| 54:3        | 907.8; 902.8        | 9,02                            | 0,22 | 8,65             | 0,78 | 8,94                      | 1,41 | 8,87                 | 0,19 |
| 54:4        | 905.8; 900.8        | 12,53                           | 0,31 | 12,08            | 0,72 | 11,98                     | 0,58 | 12,20                | 0,29 |
| 54:5        | 903.8; 898.8        | 13,35                           | 0,58 | 12,48            | 0,61 | 12,06                     | 0,97 | 12,63                | 0,66 |
| 54:6        | 901.8; 896.8        | 11,42                           | 0,41 | 11,37            | 0,96 | 10,86                     | 1,66 | 11,22                | 0,31 |
| 54:7        | 899.7; 894.8        | 3,27                            | 0,27 | 4,00             | 0,43 | 3,74                      | 0,36 | 3,67                 | 0,37 |
| 56:2        | 937.8; 932.8        | 0,84                            | 0,14 | 0,74             | 0,06 | 0,88                      | 0,15 | 0,82                 | 0,07 |
| 56:3        | 935.8; 930.8        | 1,33                            | 0,14 | 1,09             | 0,07 | 1,30                      | 0,10 | 1,24                 | 0,13 |
| 56:4        | 933.8; 928.8        | 1,52                            | 0,16 | 1,25             | 0,02 | 1,48                      | 0,10 | 1,42                 | 0,15 |
| 56:5        | 931.8; 926.8        | 0,84                            | 0,15 | 0,66             | 0,03 | 0,73                      | 0,11 | 0,74                 | 0,09 |
| 58:3        | 963.8; 958.8        | 0,41                            | 0,08 | 0,35             | 0,01 | 0,43                      | 0,05 | 0,40                 | 0,04 |
| 58:4        | 961.8; 956.8        | 0,40                            | 0,12 | 0,35             | 0,02 | 0,41                      | 0,02 | 0,39                 | 0,03 |
| 58:5        | 959.8; 954.8        | 0,08                            | 0,02 | 0,07             | 0,01 | 0,07                      | 0,02 | 0,07                 | 0,01 |

**Maize Inbred line Mo17**

| TAG species | Extracted Ion (m/z) | Distribution of TAG species (%) |      |                  |      |                           |      | Genotype average (%) |      |
|-------------|---------------------|---------------------------------|------|------------------|------|---------------------------|------|----------------------|------|
|             |                     | mock                            | SD   | <i>A. flavus</i> | SD   | <i>F. verticillioides</i> | SD   | average              | SD   |
| 50:1        | 855.7; 850.7        | 1,27                            | 0,02 | 1,54             | 0,08 | 1,58                      | 0,10 | 1,46                 | 0,17 |
| 50:2        | 853.7; 848.7        | 3,11                            | 0,23 | 3,31             | 0,11 | 3,24                      | 0,03 | 3,22                 | 0,10 |
| 50:3        | 851.7; 846.7        | 0,57                            | 0,08 | 0,67             | 0,09 | 0,71                      | 0,11 | 0,65                 | 0,08 |
| 50:4        | 849.7; 844.7        | 0,37                            | 0,02 | 0,39             | 0,06 | 0,40                      | 0,07 | 0,38                 | 0,01 |
| 52:1        | 883.8; 878.8        | 0,75                            | 0,07 | 1,16             | 0,26 | 1,09                      | 0,15 | 1,00                 | 0,22 |
| 52:2        | 881.8; 876.8        | 5,50                            | 0,21 | 5,89             | 0,22 | 5,80                      | 0,17 | 5,73                 | 0,20 |
| 52:3        | 879.8; 874.8        | 9,60                            | 0,09 | 9,66             | 0,06 | 9,36                      | 0,03 | 9,54                 | 0,16 |
| 52:4        | 877.8; 872.8        | 12,54                           | 0,52 | 11,45            | 0,74 | 11,66                     | 1,17 | 11,88                | 0,57 |
| 52:5        | 875.8; 870.8        | 2,53                            | 0,08 | 2,61             | 0,18 | 2,69                      | 0,16 | 2,61                 | 0,08 |
| 52:6        | 873.8; 868.8        | 0,27                            | 0,01 | 0,29             | 0,03 | 0,34                      | 0,08 | 0,30                 | 0,04 |
| 54:1        | 911.8; 906.8        | 0,38                            | 0,05 | 0,67             | 0,16 | 0,56                      | 0,11 | 0,54                 | 0,15 |
| 54:2        | 909.8; 904.8        | 2,17                            | 0,26 | 2,54             | 0,39 | 2,51                      | 0,29 | 2,41                 | 0,21 |
| 54:3        | 907.8; 902.8        | 7,82                            | 0,39 | 7,86             | 0,45 | 7,75                      | 0,50 | 7,81                 | 0,05 |
| 54:4        | 905.8; 900.8        | 12,62                           | 0,19 | 12,21            | 0,27 | 11,83                     | 0,15 | 12,22                | 0,39 |

|      |              |       |      |       |      |       |      |       |      |
|------|--------------|-------|------|-------|------|-------|------|-------|------|
| 54:5 | 903.8; 898.8 | 13,81 | 0,58 | 13,72 | 0,78 | 12,75 | 1,01 | 13,43 | 0,59 |
| 54:6 | 901.8; 896.8 | 14,04 | 0,56 | 13,46 | 1,39 | 13,65 | 1,30 | 13,72 | 0,30 |
| 54:7 | 899.7; 894.8 | 2,79  | 0,04 | 2,85  | 0,14 | 2,94  | 0,14 | 2,86  | 0,08 |
| 56:2 | 937.8; 932.8 | 0,80  | 0,12 | 0,89  | 0,13 | 0,91  | 0,17 | 0,87  | 0,06 |
| 56:3 | 935.8; 930.8 | 1,33  | 0,16 | 1,40  | 0,21 | 1,36  | 0,24 | 1,36  | 0,04 |
| 56:4 | 933.8; 928.8 | 2,04  | 0,16 | 2,06  | 0,26 | 2,01  | 0,29 | 2,04  | 0,02 |
| 56:5 | 931.8; 926.8 | 1,39  | 0,09 | 1,27  | 0,09 | 1,22  | 0,19 | 1,29  | 0,09 |
| 58:3 | 963.8; 958.8 | 0,36  | 0,05 | 0,43  | 0,08 | 0,42  | 0,11 | 0,40  | 0,03 |
| 58:4 | 961.8; 956.8 | 0,54  | 0,06 | 0,59  | 0,13 | 0,62  | 0,14 | 0,58  | 0,04 |
| 58:5 | 959.8; 954.8 | 0,07  | 0,01 | 0,08  | 0,01 | 0,08  | 0,02 | 0,08  | 0,01 |



**Table S5.** Primer sequences for real-time RT-qPCR analyses.

| Gene                              | Primer forward        | Primer reverse            | Gramene ID<br>B73_v5/B73_v3      | Source                                  |
|-----------------------------------|-----------------------|---------------------------|----------------------------------|-----------------------------------------|
| <i>ZmLOX1</i>                     | CTGCTCTACCCCAACACCTC  | GAACGGGGAAACGCAAACAA      | Zm00001eb144930<br>GRMZM2G156861 | NM_001111533.2<br>This paper            |
| <i>ZmLOX2</i>                     | AGCAGAGCTAGCGGTGATTC  | CAGCACCAGTACACCAAGGA      | Zm00001eb144960<br>GRMZM2G156861 | NM_001112503.2<br>This paper            |
| <i>ZmLOX3</i>                     | TCAAGATCGAGGGCAAGGTG  | CTGTGGTCAGAGGTGTTGGG      | Zm00001eb054040<br>GRMZM2G109130 | NM_001112045.1<br>This paper            |
| <i>ZmLOX4</i>                     | CACCGGACACTCCCTGAGA   | ACGTCCAGCACCTCCTTCTT      | Zm00001eb054050<br>GRMZM2G109056 | NM_001112504.2<br>This paper            |
| <i>ZmLOX5</i>                     | GGAACTTCACGGACCTTGCT  | TCCTTTATCGCCAGCTCCAC      | Zm00001eb216870<br>GRMZM2G102760 | NM_001112505.1<br>This paper            |
| <i>ZmLOX6</i>                     | GGAACTTCACGGACCTTGCT  | TCCTTTATCGCCAGCTCCAC      | Zm00001eb067710<br>GRMZM2G040095 | NM_001112506.1<br>This paper            |
| <i>ZmLOX7</i>                     | GCGAATGCGAGCTGTTTTGA  | CGAACGATCTCCCCAGTAGC      | Zm00001eb423430<br>GRMZM2G070092 | NM_001361937.1<br>This paper            |
| <i>ZmLOX8</i>                     | CCAGCTGTTCCAGAAGATCCC | ATGGATCATGGACGGAGGAG<br>G | Zm00001eb081610<br>GRMZM2G104843 | DQ335766.1<br>This paper                |
| <i>ZmLOX9</i>                     | ACTGGCGGTTTCGACCTAGAG | CTGCACATACGACTCCACCC      | Zm00001eb005920<br>GRMZM2G017616 | NM_001112507.1<br>This paper            |
| <i>ZmLOX10</i>                    | CATCGACGAGTGCAACAACA  | TGGACTAATGCATGCTGAGGA     | Zm00001eb206040<br>GRMZM2G015419 | NM_001112510.2<br>This paper            |
| <i>ZmLOX11</i>                    | GTACGAACTGCTCAAGCCCT  | TGCACGCAATAAGGCAAACC      | Zm00001eb236430<br>GRMZM2G009479 | NM_001112511.1<br>This paper            |
| <i>ZmLOX12</i>                    | TCCATTACGGAAGCGCACAT  | CGCAGGTATGGCATCAGGTA      | Zm00001eb134020<br>GRMZM2G106748 | NM_001112527.1<br>This paper            |
| <i>ZmAOS1</i>                     | ACCGGTGTCACGAAAGCTAC  | CCGAGGGTGAGAGAGAAATC      | Zm00001d048021<br>GRMZM2G067225  | NM_001111774.2<br>This paper            |
| <i>ZmAOS2</i>                     | TGATCGACCGTCCGTCAAAG  | AGCAGGGGCAAACCAAACA       | Zm00001eb009340<br>GRMZM2G002178 | NM_001152442.2<br>This paper            |
| <i>ZmOPR8</i>                     | ATCTCCGAGGGCACCATCAT  | TCCCTTGGCATGAACAGCAT      | Zm00001eb177330<br>GRMZM2G082087 | NM_001112363.2<br>This paper            |
| <i>ZmACX</i>                      | TGGAAGGACCCTCTGAACGA  | AGGTCGCGTGAGATTTTCTGA     | Zm00001eb376020<br>GRMZM5G864319 | NM_001136902.1<br>This paper            |
| <i>ZmUBCP</i>                     | GACCGACAGGGCCAAGTATG  | CCGGCACATTACCAGTTTG       | Zm00001eb066940<br>GRMZM2G102471 | NM_001154750.1<br>This paper            |
| <i>Zm<math>\beta</math>-actin</i> | ATGGTCAAGGCCGTTTCG    | TCAGGATGCCTCTCTTGCC       | Zm00001d012277<br>GRMZM2G320797  | AY273142.1<br>Maschietto et al.<br>2015 |
